# Supplementary material for: Critically appraised topic on adverse food reactions of companion animals (7): signalment and cutaneous manifestations of dogs and cats with adverse food reactions
Source: BMC Vet Res. 2019 May 9;15:140. doi: 10.1186/s12917-019-1880-2 (PMC6507158; doi:10.1186/s12917-019-1880-2)
Supplement: Supplementary file 2 — Table S2. Summary of articles reporting cats with cutaneous adverse food reactions. (XLSX 16 kb) [file 12917_2019_1880_MOESM2_ESM.xlsx]

## Sheet: Sheet1
Additional file 2: Table S2: Cats																		111
											70			Breed Predisposition		Pruritus
	Reference #	Year	Journal Abb	Author	Source	# Cats	Duration Elimination Diet (wks)	Country (ISO 3166)	Evidence	Age onset (yrs) mean (range)	% Age Onset ≤ 0.5 yr	% Age Onset ≤ 1 yr	Female-to-Male ratios	Main Pure Breeds Represented (≥ 3 or ≥ 10%)	Comparison with Reference Population	Total	Location: generalized	Location: face/head	Location: ears	Location: feet	Location: perineum	Location: ventrum	Clinical Signs	% with AD/HSD association or phenotype
1		1982	JAAHA	Stogdale	C	2	1-4	ZAF	moderate in 2 (100%)	3.4 (1.8-5.0)	0 (0%)	0 (0%)	1:1 = 1.0	one Persian, one DSH	NR	1 (50%)	NR	1 (50%)	1 (50%)	NR	NR	NR	cat 1: alopecia, cat 2: head-and-neck erosive and crusting dermatitis	NR
2		1989	JAVMA	White	CW	14	> 3	USA	weak in 3 (21%) moderate in 11 (79%)	4.9 (1.0-11.0)	0 (0%)	2 (17%)	8:6 = 1.3	DSH (9, 64%)	NR	14 (100%)	NR	6 (42%)		NR	NR	NR	self-induced alopecia (9, 64%), miliary dermatitis (3, 21%), eosinophilic plaques (2, 14%)	NR
3		1990	VD	Carlotti	C	10	3-8	FRA	weak in 10 (100%)	4.0 (0.5-10.5)	NR	NR	6:4 = 1.5	DSH (5, 50%), Siamese (3, 30%), Persian (2, 20%)	NR	10 (100%)	NR	3 (30%)	NR	NR	NR	NR	miliary dermatitis (4, 40%), self-induced alopecia (4, 40%), head-and-neck erosive and crusting dermatitis (3, 30%), otitis externa (3, 30%), eosinophilic plaques (1, 10%), eosinophilic diseases (1, 10%)	NR
4		1994	MVQ	Denis	C	13	1-13	CAN	moderate in 13 (100%)	3.9 (0.5-13.0)	4 (31%)	5 (38%)	NR	DSH (10, 77%)	Birman (?), Siamese (?)	13 (100%)	NR	3 (23%)	7 (54%)	4 (31%)	2 (15%)	6 (46%)	alopecia, macules plaques (not further specified)	NR
5		1994	JAVMA	Reedy	CW	1	3	USA	strong in 1 (100%)	2.5	0 (0%)	0 (0%)	1 FS	DSH (1 cat)	NR	1 (100%)	NR	1 (100%)	NR	NR	NR	NR	head-and-neck erosive and crusting dermatitis (1, 100%)	NR
6		1996	KTP	Runge-Harms	CW	1	4-7	DEU	strong in 1 (100%)	1.0		1 (100%)	1 FS	1 DSH	NR	0 (0%)	-	-	-	-	-	-	nodules on the neck	NR
7		1996	JVACI	Guaguère	C	17	4-10	FRA	moderate in 17 (100%)	4.8 (2.0-9.0)	0 (0%)	0 (0%)	7:10 = 0.7	DSH (14, 82%), Siamese (2, 12%)	NR	17 (100%)	NR	11 (65%)	3 (18%)	1 (6%)	NR	8 (47%)	head-and-neck erosive and crusting dermatitis (11, 65%), self-induced alopecia (8, 47%), miliary dermatitis (5, 29%), eosinophilic plaques (3, 18%), erythematous pododermatitis (2, 12%), eosinophic granuloma (1, 6%)	NR
8		2002	JFMS	Leistra	CW	20	6-10	NLD	strong in 20 (100%)	3.7 (0.2-10)	NR	NR	12:8 = 1.5	DSH (18, 90%)	NR	20 (100%)	1 (5%)	11 (55%)	NR	NR	3 (15%)	5 (25%)	urticaria (2, 10%)	NR
9		2011	VD	Hobi	B	61	6-8	GLOBAL	moderate in 61 (100%)	4	NR	NR	37:24 = 1.5	Persian (7, 11%), Siamese (3, 5%)	NR	61 (100%)	NR	37 (61%)	22 (36%)	front: 5 (8%) hind: 8 (13%)	6 (10%)	26 (43%)	head-and-neck erosive/ulcerative dermatitis (39, 64%), symmetric alopecia (26, 43%), "eosinophilic granuloma complex" (15, 25%), miliary dermatitis (12, 20%)	NR
10		2013	JJVD	Scott	C	48	4-6	USA	moderate in 48 (100%)	(0.3 - 15.0)	NR	NR	32:16 (2.0)	DSH (33, 69%), DLH (5, 10%)	Burmese (RR: 11), Maine coon (5), Himalayan (3)	NR	NR	19 (73%)	11 (42%)	4 (15%)	NR	NR	lesionless symmetrical pruritus with excoriations (26, 54%), self-induced hair loss (20, 42%), miliary dermatitis (12, 25%), "eosinophilic granuloma complex (11, 23%), superficial or deep pyoderma (9, 19%)	9 (19%)
11		2013	AVJ	Vogelnest	W	17	> 6	AUS	moderate in 17 (100%)	3.5 (0.3 - 9:0)	2 (12%)	6 (35%)	10:7 = 1.4	DSH (8, 47%), Abyssinian (4, 24%), Burmese (2, 12%), DMH (2, 12%)	NS	15 (88%)	2 (12%)	14 (82%)	4 (24%)	5 (29%)	NR	8 (47%)	alopecia (10, 59%), erythema (8, 47%), crusting (8, 47%), pyoderma (8, 47%), erosions/ulcers/excoriations (6, 35%), miliary dermatitis (6, 35%)	7 (41%)
12		2014	VD	Ravens	CW	6	8-12	AUS	moderate in 6 (100%)	3.2 (0.7-9.0)	0 (0%)	2 (33%)	4:2 = 2.0	DSH (3, 50%), Burmese (2, 33%)	NR	6 (100%)	NR	(5, 83%)	NR	2 (33%)	NR	4 (66%)	alopecia (6, 100%), crusting (6, 100%), erythema (4, 67%), miliary dermatitis (2, 33%)	6 (100%)
					TOTAL	210
					median	13.5
																							can't do totals and specific percentages as information in incomplete
					C: CAB abstracts					NR: not reported				DSH: domestic short-haired	NS: no significant association
					W: Web of Science					NA: not assessable				DMH: domestic medium-haired
					B: bibliography									DLH: domestic long-haired
